# Supplementary material for: Genome-wide hydroxymethylation tested using the HELP-GT assay shows redistribution in cancer
Source: PubMed Central journal article supplement (PMC3763560; doi:10.1093/nar/gkt601), 2013-07-16

## FIGURE LEGENDS

**Figure S1. Schema of HELP-GT assay.** HELP-tagging libraries were prepared by the process described previously (Suzuki et al. 2010) with some modifications as follows. Based on the assumption that most of the hydroxymethylated cytosines come from methylated cytosines, we added a step of  $\beta$ -GT prior to MspI or HpaII digestions (Song, 2010; Josse and Kornberg, 1962). The final library was sequenced by multiplexing in-house adapter primers using Illumina HiSeq 2000.

**Figure S2. 5-hmC and 5-mC estimation by the HELP-GT assay are reproducible.** Unsupervised clustering of two independent replicates shows high degree of concordance for both 5-hmC and 5-mC analysis (A, C). A high degree of concordance was also seen in gene specific localization of 5-hmC and 5-mC sites for replicates (B, D) as shown for the representative control sample.

**Figure S3. 5-hmC correlates with gene expression at proximal and intragenic regions: 5-hmC and 5-mC loci were mapped relative to RefSeq transcripts expressed at different levels in pancreatic cancer (Panc Ca1) cells.** RefSeq transcripts were divided into two bins based on gene expression level and 5-hmC or 5-mC genomic loci reads falling in 10-bp bins centered on transcription start sites or end sites. Proximal and intragenic enrichment of 5-hmC is seen in highly expressed genes (A, B). 5-mC levels are decreased around TSS and enriched in intragenic areas for highly expressed genes. (C, D).

**Figure S4. Acquisition of 5-hmC at different promoters** *MMP11* (A) *VAV2* (B) and *LATS2* (C) show increased 5-hmC at promoter regions as shown by brown marks. 5-mC marks are shown as downward blue lines. The scale is from 0 to 100. Top panel shows RNA-seq data demonstrating increased expression of *MMP11*, *VAV2* and *LATS2* in pancreatic cancer cells. *RBM38* (D) shows increased 5-hmC at promoter regions as shown by brown marks. 5-mC marks are shown as downward blue lines. The scale is from 0 to 100. Top panel shows RNA-seq data demonstrating increased expression of *RBM38* in pancreatic cancer cells.

**Figure S5. 5hmC loci are distributed throughout the genome** Circos plots of 5-hmC loci (orange bars) and gene expression (by RNA seq, green bars) show genome wide prevalence of 5-hmC loci in both control (A) and cancer cell lines Panc Ca1 (B) and Panc Ca2 (C). The length of the bars corresponds to amount of 5-hmC and magnitude of expression.

Table S1:

**Genomic locations and primers for 5-hmC validations:**

| Chromosome | Position  | Gene     | Fwd primer            | Rev primer            |
|------------|-----------|----------|-----------------------|-----------------------|
| chr19      | 39658315  | PAK4     | CTTGGGACCAGCTGAGACAG  | CCCAGAGCTAGGACCATCCA  |
| chr21      | 38603328  | TMPRSS3a | GGACAAGTGTCCCACGTCAT  | ACCTGTTCTCCTGGTCCTCA  |
| chr6       | 170594425 | DLL1     | TGGGGTCACACTCGTCAATC  | AGGGGAGCTACACTTGCTCT  |
| chr9       | 136748793 | VAV2c    | CCCAAGTCATCCCCAGCC    | ATTGCACAGGTGACCGGAAG  |
| chr7       | 923330    | GET4d    | CCCTATCTGGAAGGCACGTC  | GGTGACTAAGCCAGGACAGG  |
| chr22      | 24111338  | MMP11    | TCTGGGTGACTTTGCAGTGG  | AGCAGTGATGAGGGACAGT   |
| chr16      | 15028924  | NIPIa    | GACGGTGCAGATGTCCCATA  | TGCTCAGGACAGGGATGAGA  |
| chr16      | 88990095  | CBFA2T3  | AGCAGCTGGGTTGTGAAGG   | GTTCCAAAGCCGACCTCCAT  |
| chr9       | 136746964 | VAV2a    | TACTACTCCAGGCAGCGTGT  | ACTTGCTGCGTGTCTGATCT  |
| chr10      | 43614886  | RET      | TGTGTCCACCCCCTTACTCA  | CAGCTTGGGTCTTCCAGGAG  |
| chr9       | 136844169 | VAV2e    | TTTAGGGTCTCCTCCAGCCA  | ACGAAAGCTCTTCCGAAGCC  |
| chr9       | 136845219 | VAV2f    | AGTAGGGTGGAGAACAGGCT  | GAGACAGAGAACCAGGTGCC  |
| chr7       | 922846    | GET4e    | GTGACTCCTGGCAGAGCAG   | ATTTACAAGGACCCCTCCG   |
| chr19      | 5041526   | KDM4B    | AGCCAGGCTTTCTCTGATTTT | GTTTGTAAACACGCTGTGGGC |
| chr15      | 40396398  | BMF      | CAGCAGACTCAACCCTCCTC  | TCAGTGCATTGCAGACCAGT  |

Table S2:

**Genomic distribution of HpaII/MspI sites**

| Genomic Position | Number of sites |
|------------------|-----------------|
| Total            | 2,326,002       |
| CpG islands      | 288,413         |
| CpG shores       | 255,321         |
| Promoter         | 313,138         |
| Gene Body        | 950,168         |

Table S3:

**MspI, HpaII and  $\beta$ GT-MspI counts of Panc Ca1 samples for the loci that were validated to have 5hmC marks.**

| Gene Name | HpaII counts | GT-MspI counts | MspI counts |
|-----------|--------------|----------------|-------------|
| VAV2      | 1            | 1              | 3           |
| CBFA2T3   | 4            | 3              | 14          |
| MMP11     | 1            | 1              | 4           |
| NIPI      | 3.285714286  | 3.142857143    | 8.714285714 |
| PAK4      | 4            | 5              | 14          |
| DLL1      | 1            | 5              | 14          |
| RET       | 3            | 2              | 12          |
| TMPRSS3   | 1            | 3              | 6           |
| GET4      | 0.333333333  | 2.333333333    | 8.666666667 |

Figure S1

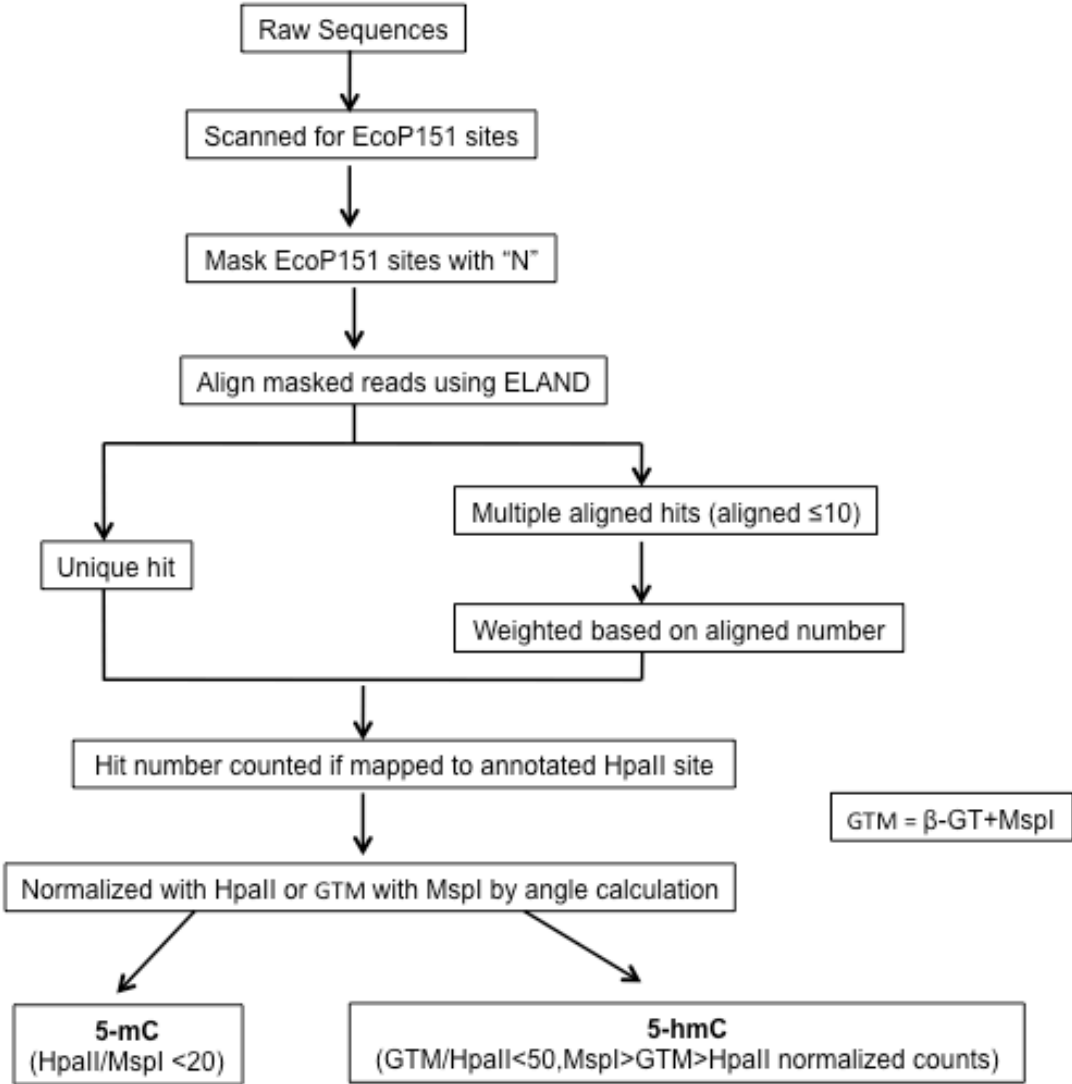

Figure S2

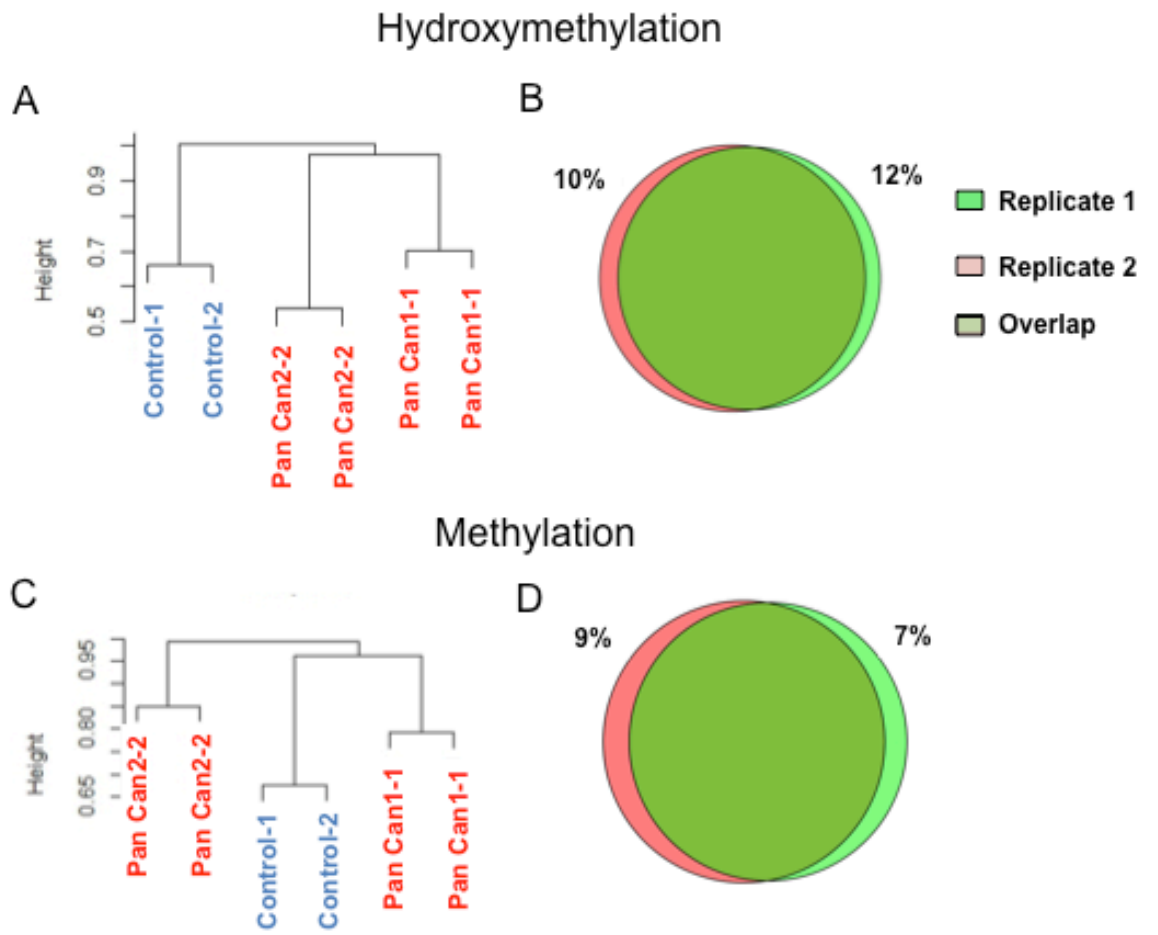



Figure S3

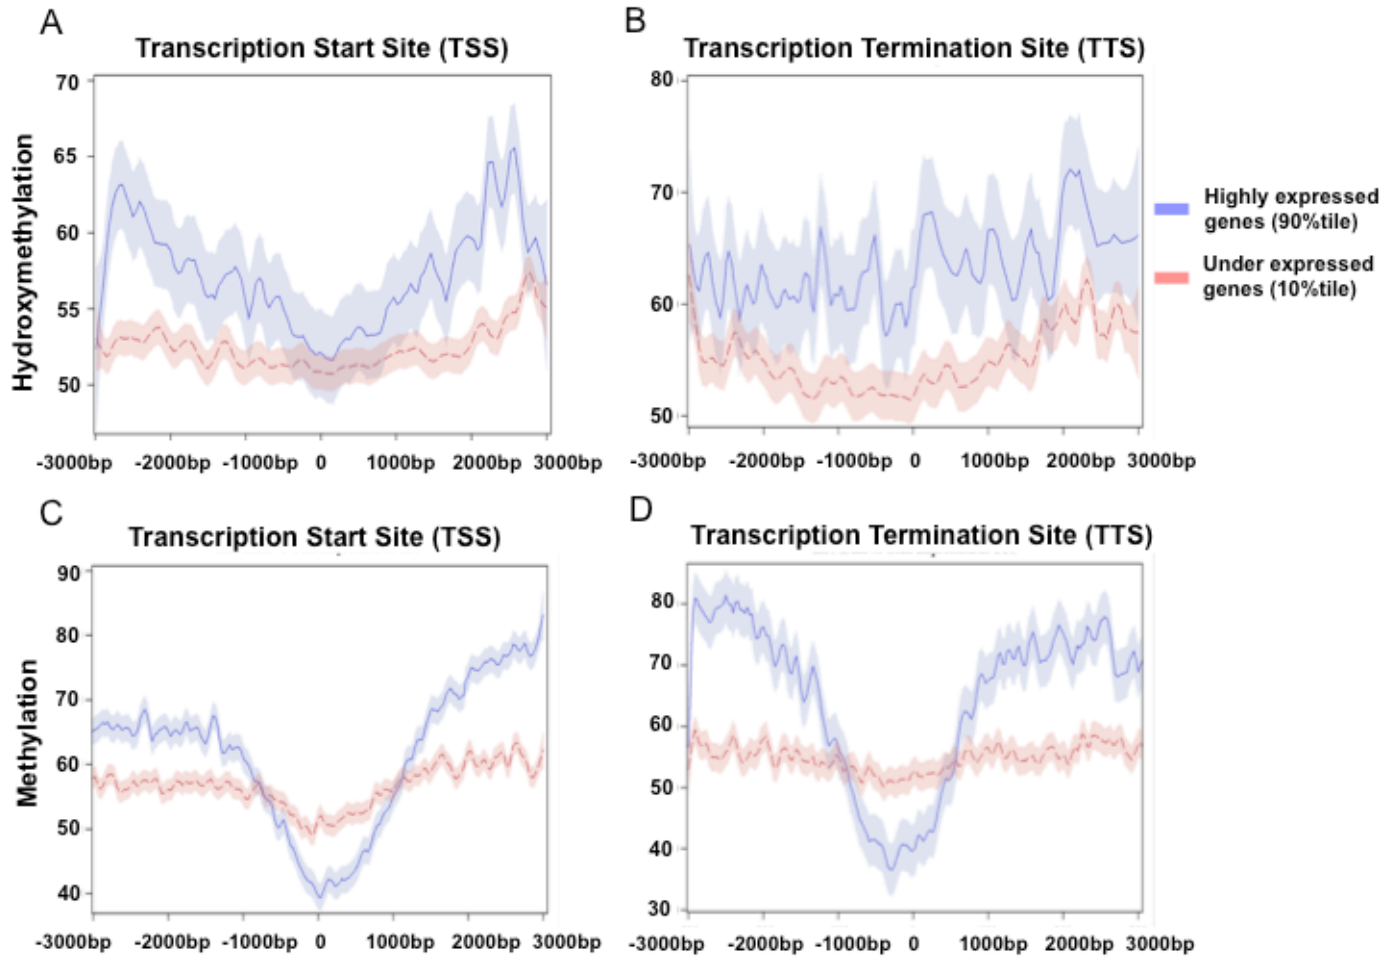

Figure S4

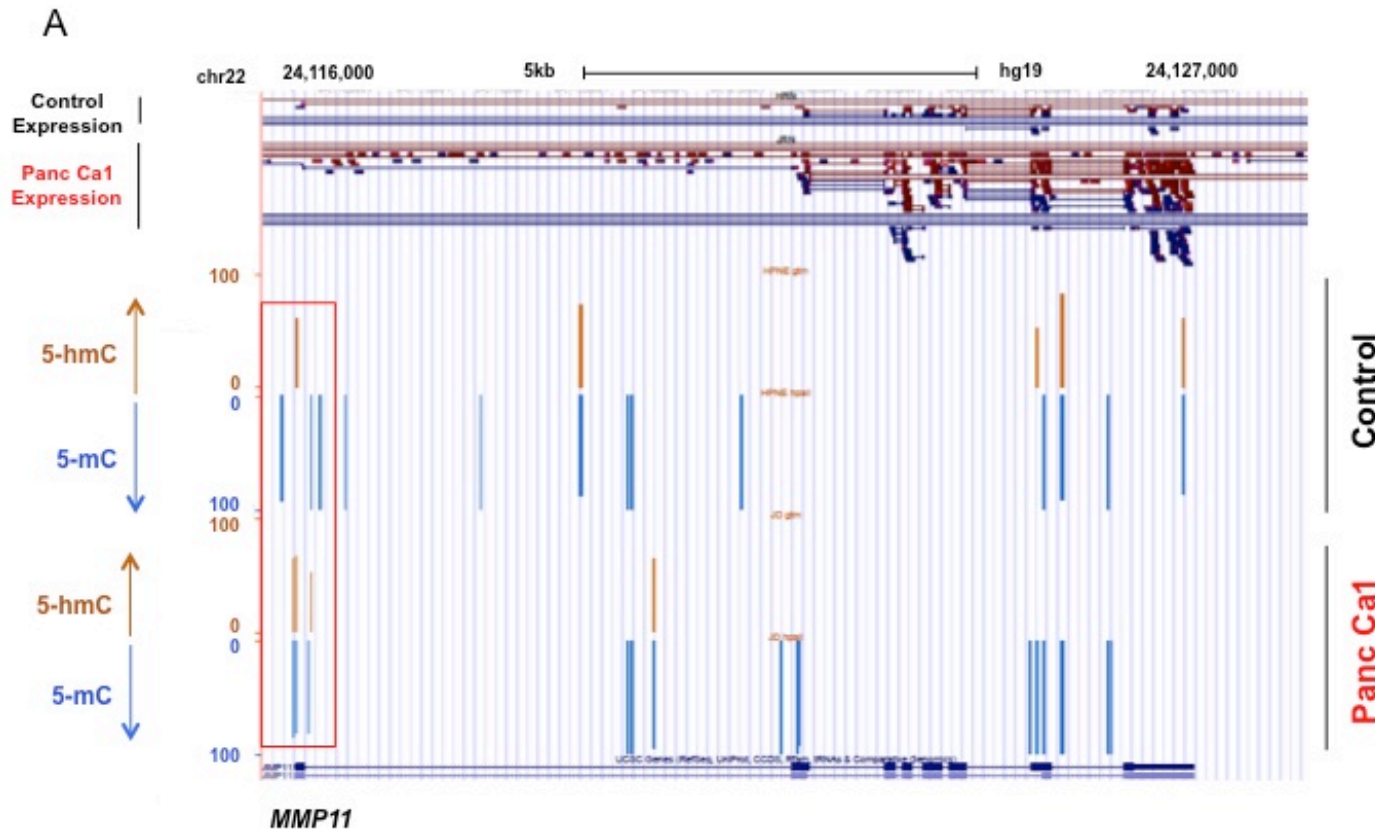

Figure S4

B

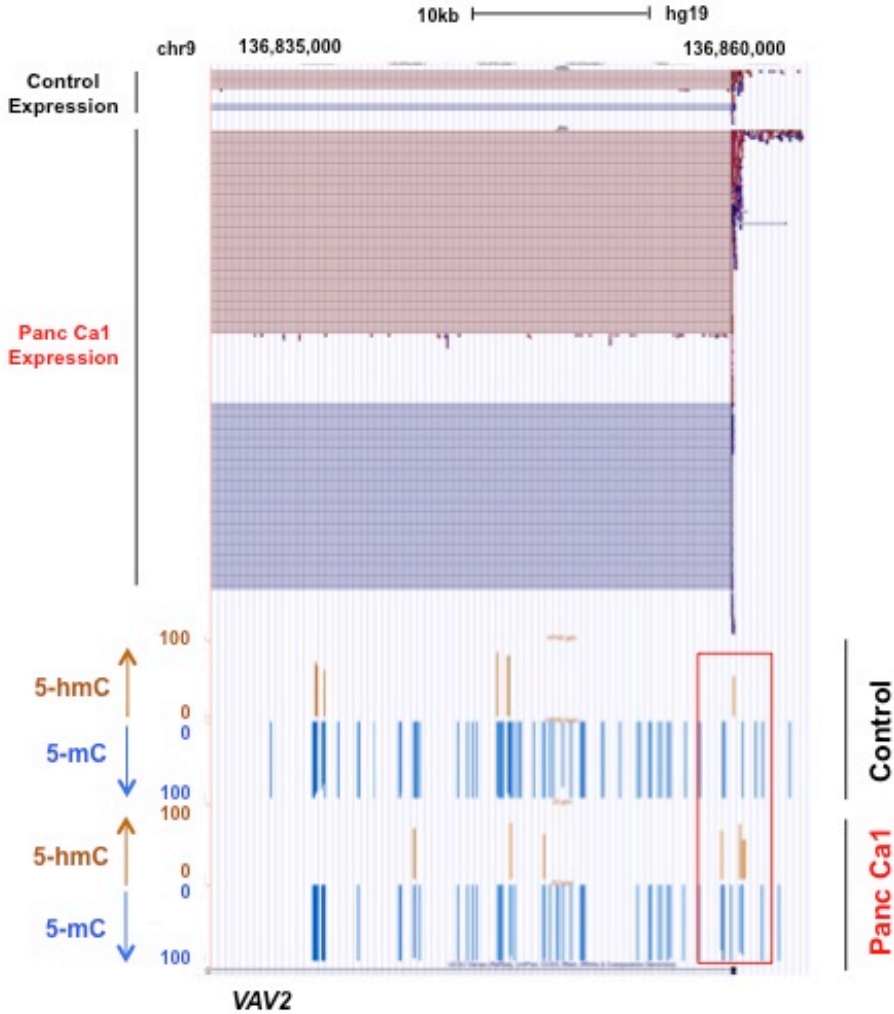



Figure S4

C

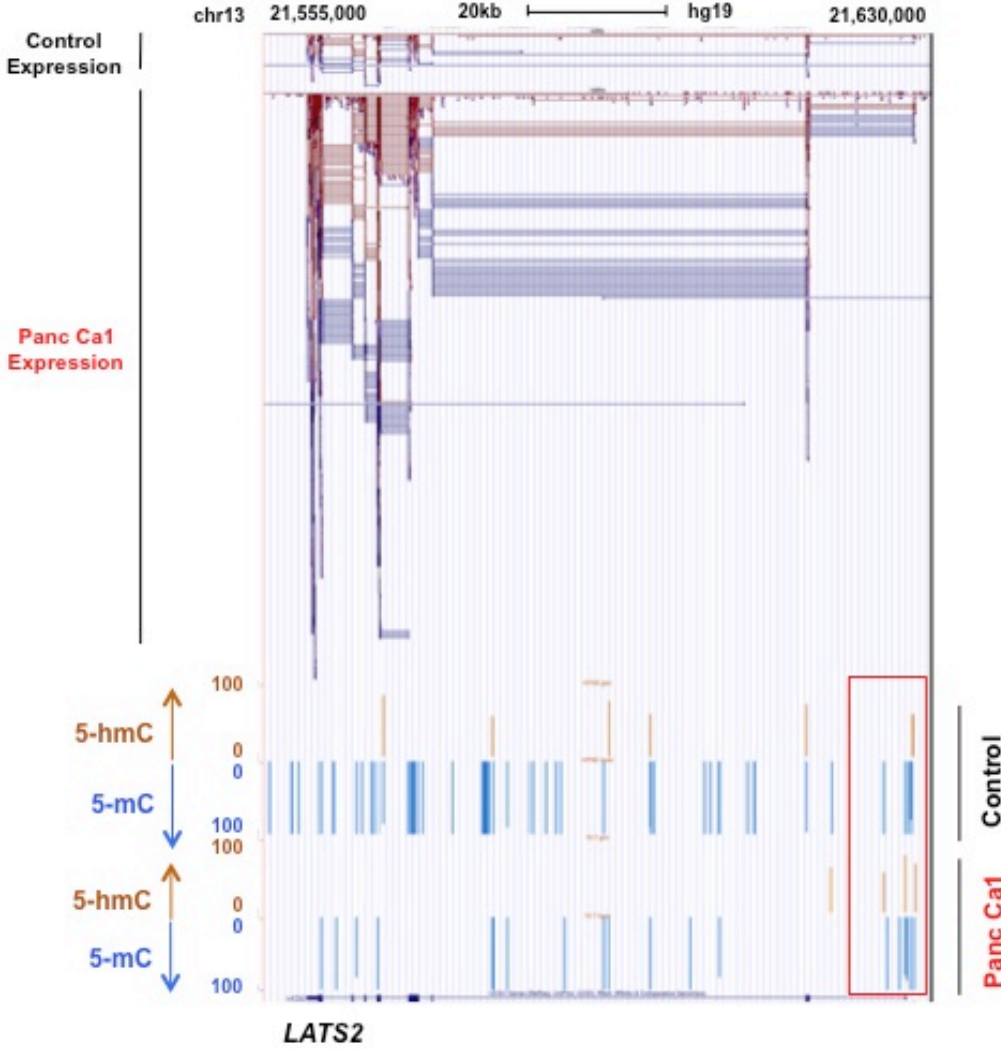

Figure S5

A

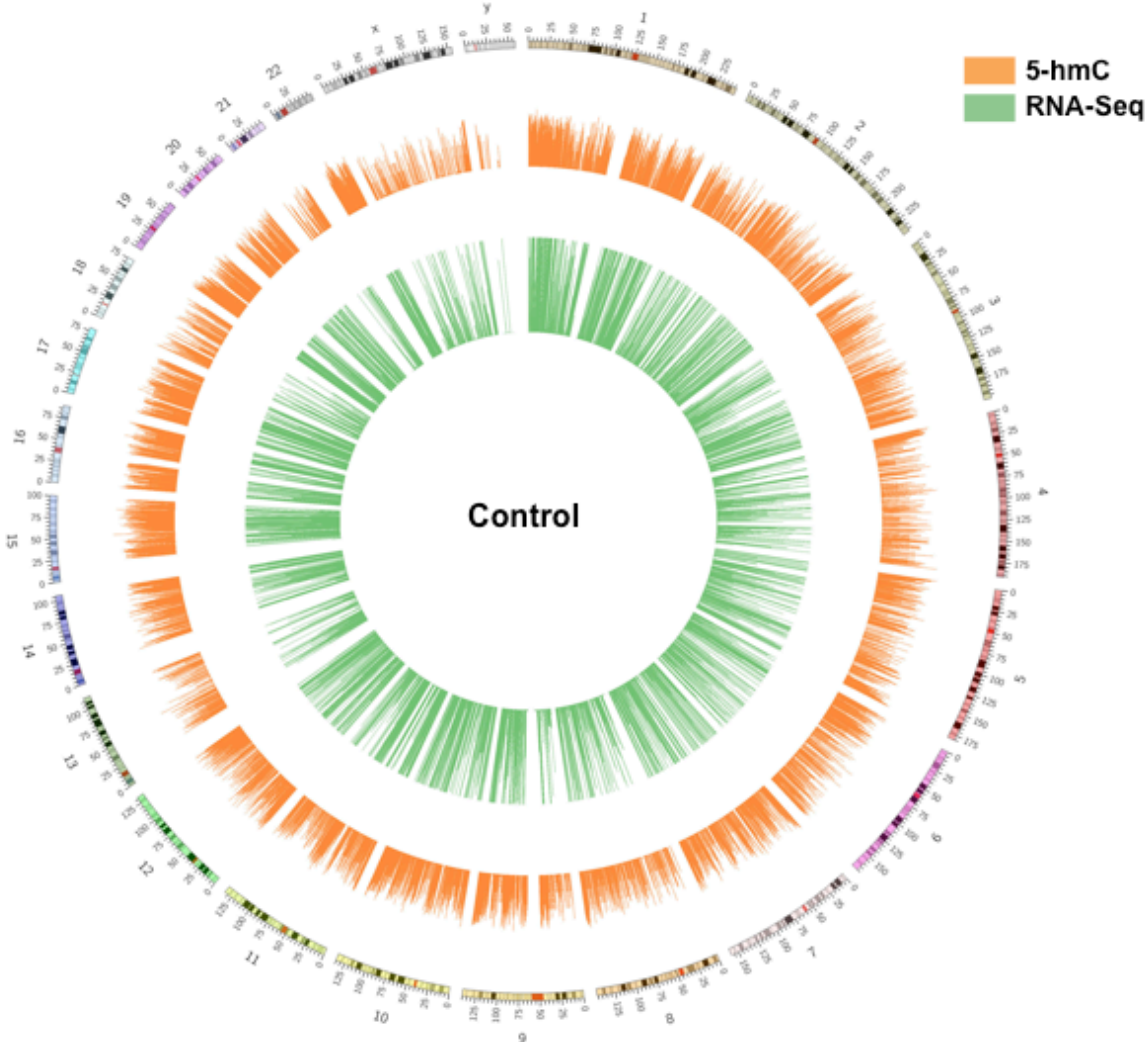

Figure S5

B

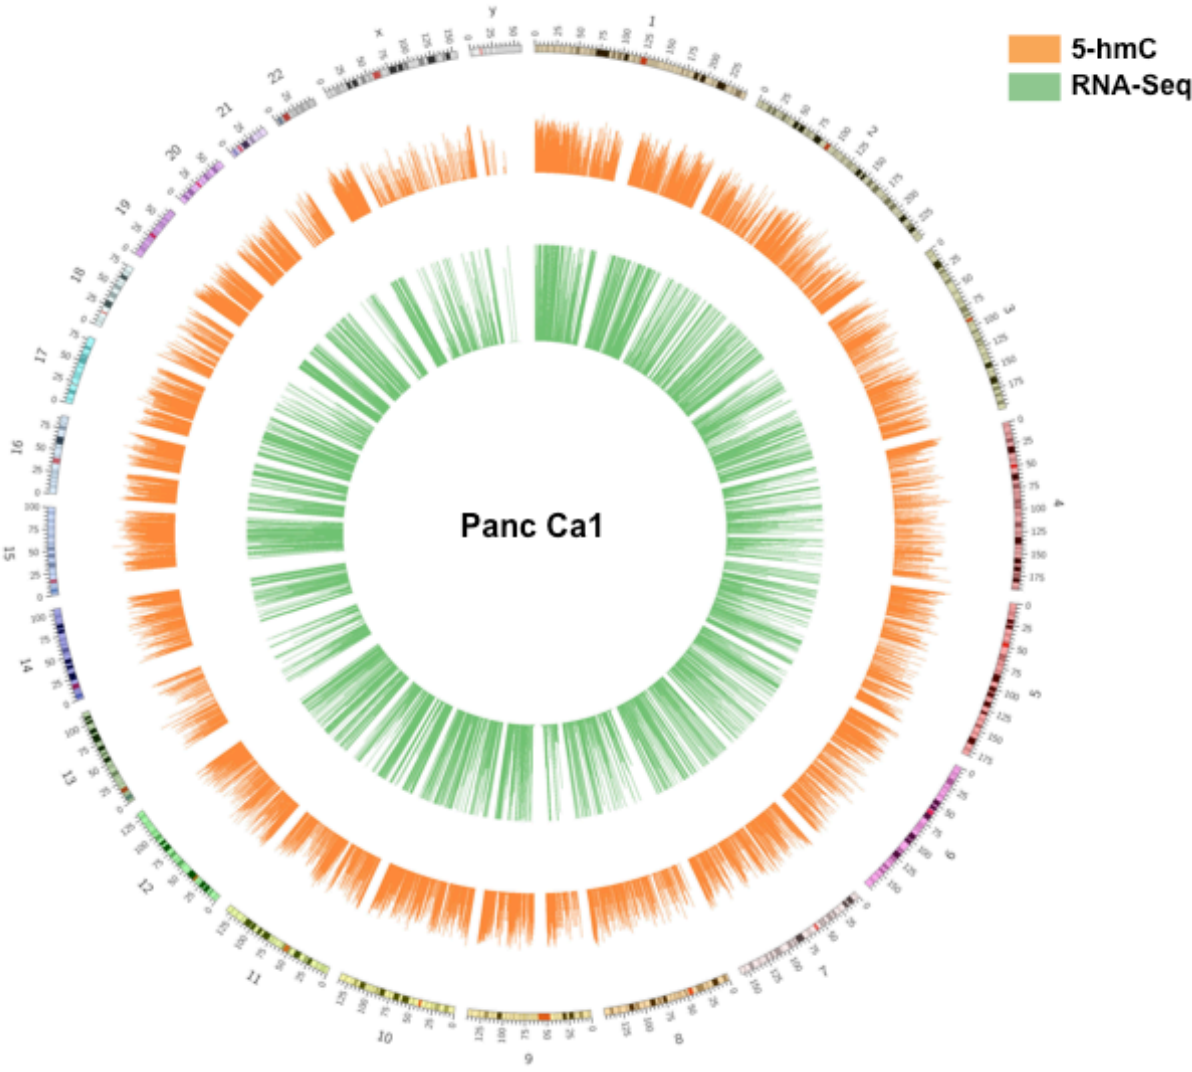

Figure S5

C

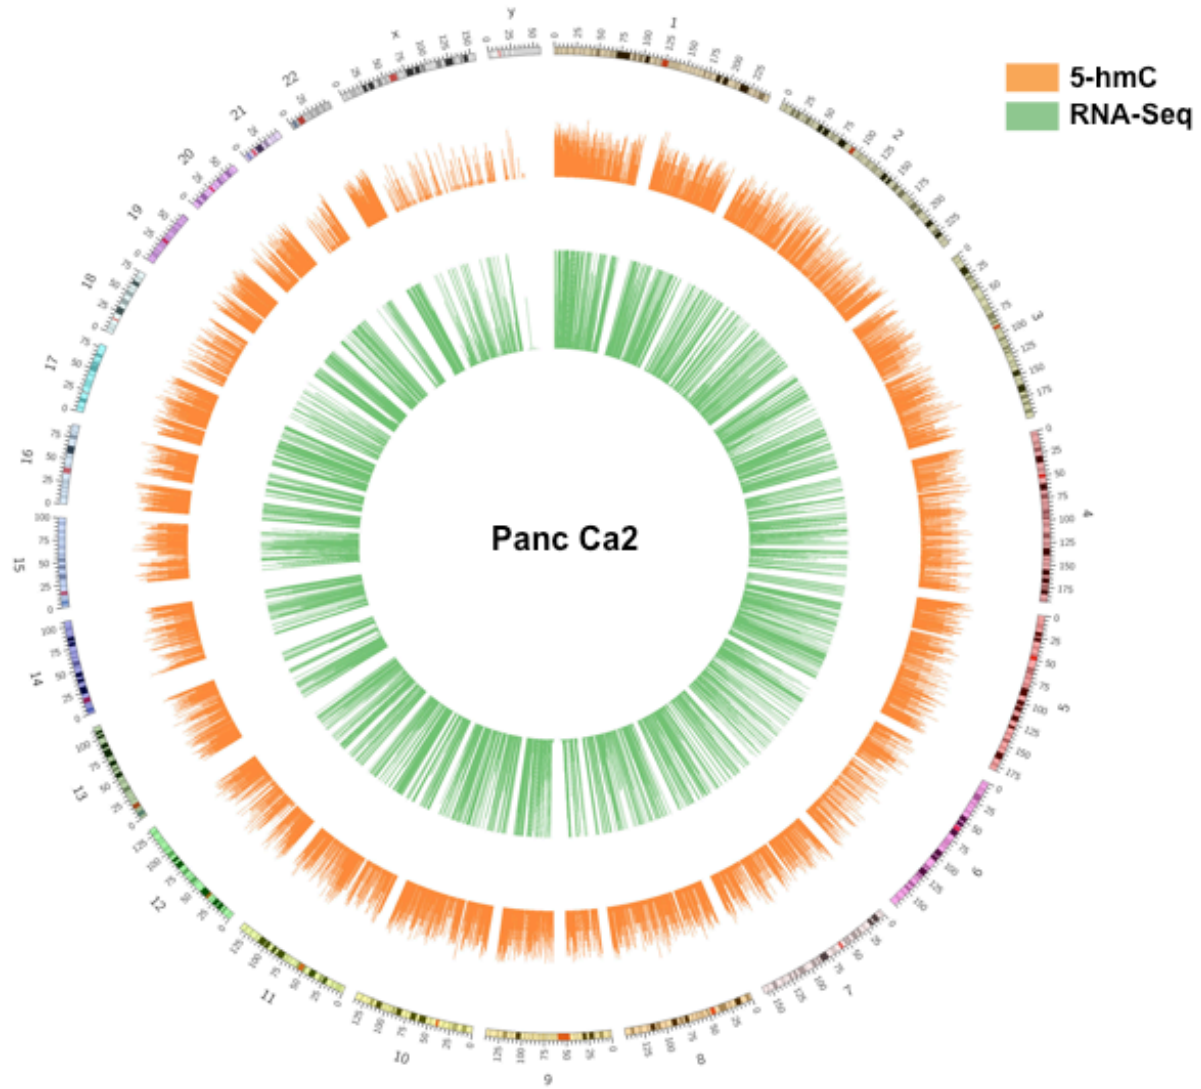

Supplement: supp_gkt601_nar-01243-met-g-2013-File002.pdf [file supp_gkt601_nar-01243-met-g-2013-File002.pdf]
